# Supplementary material for: Preparation of Hydrophobic Cryogel Containing Hydroxyoxime Extractant and Its Extraction Properties of Cu(Ⅱ)
Source: MDPI journal article supplement (doi:10.3390/gels10010009), 2023-12-21
Supplement: s1 [file s1]

## Supporting Information

# Preparation of Hydrophobic Cryogel Containing Hydroxyoxime Extractant and Its Extraction Properties of Cu( II )

Hayato Takase <sup>1</sup>, Naoto Goya <sup>2</sup>, Shiro Kiyoyama <sup>3</sup>, Koichiro Shiomori <sup>4</sup> and Hideki Matsune <sup>4,\*</sup>

<sup>1</sup> Department of Chemical Engineering, Graduate School of Science and Engineering, Kagoshima University, 1-21-40 Korimoto, Kagoshima 890-0065, Japan

<sup>2</sup> Department of Applied Chemistry, Graduate School of Engineering, University of Miyazaki, 1-1 Gakuenkibanadai-nishi, Miyazaki 899-2192, Japan

<sup>3</sup> Department of Chemical Science and Engineering, National Institute of Technology, Miyakonojo College, 473-1 Yoshi-cho, Miyakonojo-shi, Miyazaki 885-8567, Japan

<sup>4</sup> Department of Applied Chemistry, University of Miyazaki, 1-1 Gakuenkibanadai-nishi, Miyazaki 899-2192, Japan

\* Correspondence: matsune@cc.miyazaki-u.ac.jp; Tel.: +81-985-58-7306

**Keywords:** Hydrophobic cryogel; Cryo-polymerization; Frozen temperature of organic solvent; Supermacroporous structure; Extraction properties of Cu( II ).

Table S1. Preparation condition of hydrophobic cryogel

| Entry | DO [g] | AcOH [g] | DMSO [g] | Trim [g] | BPO [g] | EDMAB [ g] | T [°C] <sup>a</sup> |
|-------|--------|----------|----------|----------|---------|------------|---------------------|
| 1     | 25.825 | -        | -        | 4.907    | 0.702   | 0.558      | -15                 |
| 2     | -      | 26.25    | -        | 7.445    | 1.066   | 0.846      | -15                 |
| 3     | -      | -        | 27.51    | 5.956    | 0.853   | 0.677      | -15                 |
| 4     | 25.825 | -        | -        | 4.907    | 0.702   | 0.558      | -5                  |
| 5     | -      | 26.25    | -        | 7.445    | 1.066   | 0.846      | -5                  |
| 6     | -      | -        | 27.51    | 5.956    | 0.853   | 0.677      | -5                  |
| 7     | 25.825 | -        | -        | 4.907    | 0.702   | 0.558      | 0                   |
| 8     | -      | 26.25    | -        | 7.445    | 1.066   | 0.846      | 0                   |
| 9     | -      | -        | 27.51    | 5.956    | 0.853   | 0.677      | 0                   |
| 10    | -      | 26.25    | -        | 14.89    | 1.066   | 0.845      | -15                 |
| 11    | -      | -        | 27.51    | 11.91    | 0.853   | 0.677      | -15                 |
| 12    | -      | 26.25    | -        | 2.863    | 1.066   | 0.846      | -15                 |
| 13    | -      | -        | 27.51    | 2.978    | 0.853   | 0.677      | -15                 |
| 14    |        |          | 27.51    | 1.489    | 0.853   | 0.677      | -15                 |

<sup>a</sup>Means the temperature of cryo-polymerization.
